# Supplementary material for: Shallow Whole Genome Sequencing on Circulating Cell-Free DNA Allows Reliable Noninvasive Copy-Number Profiling in Neuroblastoma Patients
Source: Oxford University Press journal article supplement (doi:10.1158/1078-0432.ccr-17-0675), 2017-07-14
Supplement: 10780432ccr170675-sup-180115_2_supp_4150252_msw2ws.docx [file 10780432ccr170675-sup-180115_2_supp_4150252_msw2ws.docx]

**Supplemental material**

Supplemental figure 1: Comparison of the copy number profiles of 4 cases generated with sWGS on cfDNA (at 100 kb binsize), sWGS on tumor DNA (at 100 kb binsize), sWGS on tumor DNA (at 15 kb binsize) and arrayCGH on tumor DNA (at 180k resolution).

Supplemental figure 2 : Heatmap describing the concordance between arrayCGH data on tumor DNA vs sWGS of cfDNA. Numbers on the right reflect the case numbers, followed by a 1 for aCGH data on the tumor, and 2 for sWGS data on the cfDNA; the numbers on the top and bottom indicate the chromosome numbers. Red=copy number gain, blue=copy number loss.

Supplemental figure 3: Validation of *LIN28B* amplification by Q-PCR.Y-axis represents the haploid copy number, X-axis represents the samples. NGP is a NB cell line that was used as a positive control, since this cell line showed gain of *LIN28B* in arrayCGH, gDNA:genomic DNA, NTC: no template control

Supplemental table 1: Detailed patient and sample information file
